# Supplementary material for: From Lab to Farm: Elucidating the Beneficial Roles of Photosynthetic Bacteria in Sustainable Agriculture
Source: MDPI journal article supplement (doi:10.3390/microorganisms9122453), 2021-11-28
Supplement: s1 [file s1]

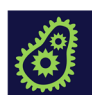

Review

# From Lab to Farm: Elucidating the Beneficial Roles of Photosynthetic Bacteria in Sustainable Agriculture

Sook-Kuan Lee <sup>1</sup>, Huu-Sheng Lur <sup>2</sup> and Chi-Te Liu <sup>1,3,4,\*</sup>

<sup>1</sup> Institute of Biotechnology, National Taiwan University, R412, No. 81, Chang-Xing St, Taipei 106, Taiwan; D06642002@ntu.edu.tw

<sup>2</sup> Department of Agronomy, National Taiwan University, No.1, Sec. 4, Roosevelt Road, Taipei 106, Taiwan; lurhs@ntu.edu.tw

<sup>3</sup> Agricultural Biotechnology Research Center, Academia Sinica, No.128, Sec.2, Academia Rd., Nankang, Taipei 115, Taiwan

<sup>4</sup> Department of Agricultural Chemistry, National Taiwan University, No.1, Sec. 4, Roosevelt Road, Taipei 106, Taiwan

\* Correspondence: chiteliu@ntu.edu.tw; Tel.: +886-2-3366-6025

## Supplementary Materials

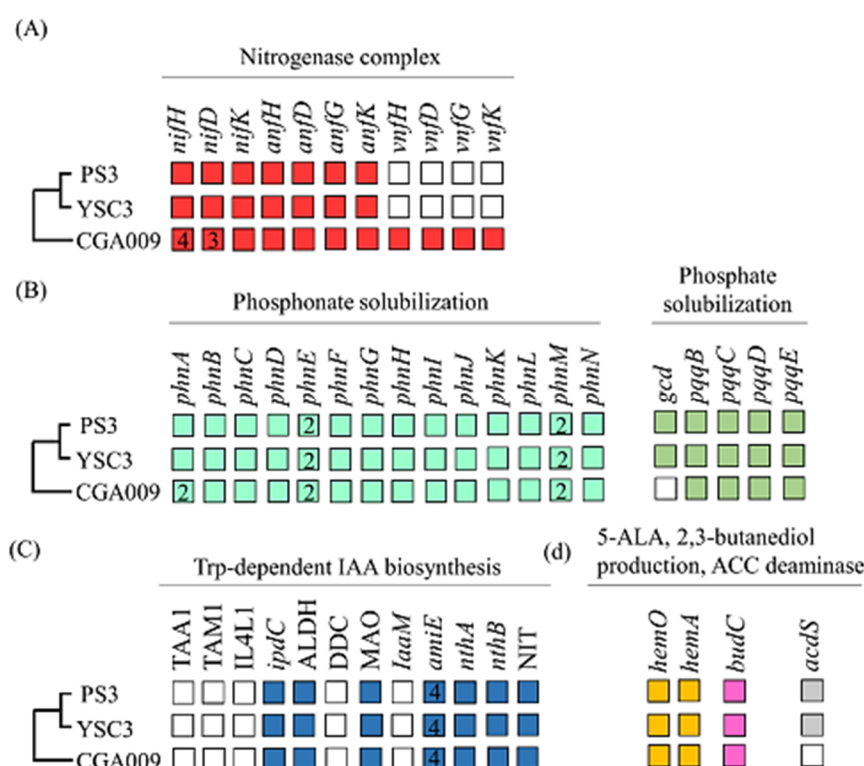

**Supplementary Figure S1.** Genes potentially related to plant growth promotion and biofilm formation in different strains of PS3, YSC3, and CGA009. An overview of 150 genes showing their presence (colored) and absence (empty) of (A) nitrogenases, (B) (C) phosphate solubilization, Trp-dependent IAA biosynthesis (D) 5-ALA, 2,3-butanediol production, ACC deaminase. Multicopies of genes are labeled by their copy number inside the filled squares. TAA1, tryptophan-pyruvate 155 aminotransferase; TAM1, tryptophan aminotransferase; IL4L1, amino-acid oxidase; 156 ALDH, aldehyde dehydrogenase; DDC, aromatic amino acid decarboxylase; TSO, 157 tryptophan side-chain oxidase; MAO, monoamine oxidase; NIT, nitrilase [40].

**Supplementary Table S1.** Beneficial effects of PNSB on different crops. Most of the information listed below was adapted from Table 1 and Table 2 of Sakarika et al., (2020) [39].

| No. | Reference                   | Country          | PNSB                             | Applica-<br>tion<br>Method | Dosage                                                                                                                                     | Crop                             | Growth<br>Conditions | Beneficial effect                                                                                                                    |
|-----|-----------------------------|------------------|----------------------------------|----------------------------|--------------------------------------------------------------------------------------------------------------------------------------------|----------------------------------|----------------------|--------------------------------------------------------------------------------------------------------------------------------------|
| 1   | Kobayashi and Haque (1971)  | Japan            | <i>R. capsulatus</i>             | Irrigation                 | PNSB powder                                                                                                                                | Rice variety Kyoto Asahi         | Pot                  | Enhanced grain number per ear by 32%                                                                                                 |
| 2   | Kobayashi and Tchan (1973)  | Japan, Australia | Phototrophic bacteria            | Irrigation                 | Diluted solution                                                                                                                           | Citrus (10 years old)            | Field                | Increased fruit weight and sugar and carotenoid contents                                                                             |
| 3   | Elbardy and El-banna (1999) | Egypt            | <i>R. capsulatus</i> DSM155      | Irrigation                 | $2.2 \times 10^8$ CFU/mL of suspension into 60 mL nutrient solution                                                                        | Rice cv. Giza 159, 171, 176, 181 | Hydroponic           | Improved aerial part by 47–100%<br>Enhanced N content by 45–78%                                                                      |
| 4   | Elbardy et al., 1999b       | Egypt            | <i>R. capsulatus</i> DSM155      | Dipping                    | $10^8$ CFU/mL suspension mixed with 10% (w/v) gum arabic<br>0.05 M phosphate buffer (pH 7.0) mixed with 10% (w/v) gum arabic               | Rice variety Giza 177            | Pot                  | Increased straw yield and grain yield by 9–33%<br>Increased panicle length, panicle weight, and panicle number                       |
| 5   | Harada et al., 2005         | Japan            | <i>R. palustris</i> KN122        | Irrigation                 | 10 g rice straw with $1.7 \times 10^{11}$ MPN/pot (day 0)<br>$5.0 \times 10^9$ MPN/pot (day 43)<br>$5.1 \times 10^{10}$ cells/pot (day 86) | Rice variety Nipponbare          | Pot                  | Increasing grain yield per pot by 21–29%<br>Increased plant height and tiller number                                                 |
| 6   | Koh and Song (2007)         | China            | <i>R. palustris</i> KL9 and BL6  | Irrigation                 | $4 \times 10^9$ cell suspension (daily for 8 weeks)                                                                                        | Tomato                           | Petri dish           | Increased dry mass of seedlings<br>Increased the root and shoot lengths of germinated seedlings by 123.5% and 54%, respectively      |
| 7   | Lee et al., 2008            | Korea            | <i>R. capsulatus</i> KL9 and BL6 | Dipping                    | One application of $5 \times 10^7$ cells                                                                                                   | Tomato                           | Pot                  | Increased fresh weight by 97% compared with that of the control<br>Increased lycopene content and vegetative growth (root and shoot) |
| 8   | Kondo et al., 2010          | Japan            | <i>R. sphaeroides</i>            | Irrigation (split)         | 2.5–1.25 g cells                                                                                                                           | Tomato                           | Field                | No significant difference in fruit weight but increased contents of ascorbic acid, malic acid and phosphoric acid in fruit           |
| 9   | Eldin and El-banna (2011)   | Egypt            | <i>R. sphaeroides</i> DSM155     | Irrigation                 | $10^8$ CFU/mL cell suspension with 10% of gum arabic                                                                                       | Rice cv. Giza 177                | Field                | Improved grain yield up to 66%<br>Increased reproductive parameters in paddy                                                         |

|    |                    |        |                                                               |                               |                                                                                                                                                                                               |                                |                                    |                                                                                                                                                                                                                                     |
|----|--------------------|--------|---------------------------------------------------------------|-------------------------------|-----------------------------------------------------------------------------------------------------------------------------------------------------------------------------------------------|--------------------------------|------------------------------------|-------------------------------------------------------------------------------------------------------------------------------------------------------------------------------------------------------------------------------------|
| 10 | Yin et al., 2012   | China  | <i>PSB</i>                                                    | Foliar spraying               | $2.0 \times 10^9$ CFU/mL twice per week                                                                                                                                                       | Chinese dwarf cherry           | Hydroponic (drought stress)        | Significant accumulation of fresh weight, leaf area and photosynthetic rate<br>Induced the activities of superoxide dismutase (SOD) and ascorbate peroxidase (APX)                                                                  |
| 11 | Wu et al., 2013    | China  | <i>Rhodopseudomonas</i> sp. ISP-1                             | Foliar spraying<br>Irrigation | Foliar spraying (F): $2.4 \times 10^{12}$ CFU (total)<br>Soil irrigation (S): $3.0 \times 10^{12}$ CFU (total)<br>Foliar spraying and soil irrigation (F+S): $2.7 \times 10^{12}$ CFU (total) | Sweet leaves                   | Pot                                | Increased the plant yield in all treatments and increased the chlorophyll content, shoot biomass and stevioside content significantly in the foliar with spray treatment.                                                           |
| 12 | Kang et al., 2014  | Korea  | <i>R. sphaeroides</i> KE149                                   | Irrigation                    | 5-mL cell suspensions ( $1 \times 10^6$ CFU/mL)                                                                                                                                               | Cucumber                       | Pot (water lodging stress)         | Increased root length, shoot fresh weight, shoot dry weight, and chlorophyll content via secretion of indole acetic and organic acids<br>Enhanced on gibberellin content in plant<br>Reduction on abscisic acid content in cucumber |
| 13 | Wong et al., 2014  | Taiwan | <i>R. palustris</i> PS3 and YSC3                              | Irrigation                    | $10^6$ CFU/g per week                                                                                                                                                                         | Maruba santoh                  | Pot                                | PS3 and half the normal amount of fertilizer produced the same plant growth potential as 100% of the normal amount of fertilizer                                                                                                    |
| 14 | Yang et al., 2014  | China  | <i>Ru. gelatinosus</i>                                        | Irrigation                    | Adjust bacterial concentration to an OD <sub>600</sub> of 0.5 and 10 mL inoculated into soil                                                                                                  | Tomato                         | Field                              | Increased agricultural traits and antioxidant value of tomato                                                                                                                                                                       |
| 15 | Miao et al., 2014  | China  | Photosynthetic bacteria (PSB)                                 | Foliar spraying               | $1 \times 10^9$ – $4 \times 10^9$ CFU/mL                                                                                                                                                      | Yellow-skinned watermelon      | Field (low temperature stress)     | Decreased the decomposition of chlorophyll and antioxidant enzymes to protect the membrane system under low temperature stress                                                                                                      |
| 16 | Ge and Zhang, 2015 | China  | PS21( <i>Rhodopseudomonas</i> sp., <i>Rhodospirillum</i> sp.) | Irrigation                    | $1 \times 10^7$ CFU/mL                                                                                                                                                                        | Wheat                          | Pot (tetrabromobisphenol A stress) | Increased soluble sugar content, soluble protein content, SOD, CAT and POD activities<br>Decreased MDA content in wheat                                                                                                             |
| 17 | Hsu et al., 2016   | Taiwan | <i>R. palustris</i> PS3 and YSC3                              | Irrigation                    | $10^6$ CFU/mL per week                                                                                                                                                                        | Maruba santoh<br>Cuiyu cabbage | Hydroponic                         | Increased the number of consumable leaves by 28% and reduced the nitrate content in Chinese cabbage<br>Increased the number of consumable leaves by 40% and reduced the nitrate content in Cuiyu cabbage                            |

|    |                         |           |                                             |                    |                                                                                                                          |                               |                                                                                                                                                                                                                                         |
|----|-------------------------|-----------|---------------------------------------------|--------------------|--------------------------------------------------------------------------------------------------------------------------|-------------------------------|-----------------------------------------------------------------------------------------------------------------------------------------------------------------------------------------------------------------------------------------|
|    |                         |           |                                             |                    |                                                                                                                          | Crinkle garden lettuce        | Increased plant weight by 16% and reduced the nitrate content in lettuce                                                                                                                                                                |
| 18 | Kantha et al., 2015     | Thailand  | <i>R. palustris</i> TN114, PP803, and TK103 | Irrigation         | One application every two weeks of $10^8$ cells/gram with rice husk ash and rice straw (vegetative growth)               | Rice (Thai jasmine KDML105)   | Saline field: Increased grain yield by 5–8% (inoculated with PP803 and TK103)<br>Organic field: Increased grain yield by 30–48% when inoculated with TN114, TK103 and PP803 compared with the control                                   |
|    |                         |           |                                             |                    | One application per week of $10^8$ cells/gram with rice husk ash and rice straw (reproductive and maturation stages)     |                               |                                                                                                                                                                                                                                         |
| 19 | Kantachote et al., 2016 | Thailand  | <i>R. palustris</i> TN114 and PP803         | Root dipping       | Immerse seedlings in culture supernatant for 12 hours                                                                    | Rice                          | Pot: Increased fresh and dry weights by up to 70% in both saline and normal conditions (inoculation treatment)                                                                                                                          |
| 20 | Xu et al., 2016         | China     | <i>R. palustris</i> sp.                     | Irrigation         | Irrigate <i>Stevia</i> seedlings with $10^7$ CFU/mL x 100 mL inoculant on 60th, 67th, 74th, and 81st day after emergence | Sweet leaf                    | Field: Increased biomass slightly but not significantly                                                                                                                                                                                 |
| 21 | Lee et al., 2016        | Taiwan    | <i>R. palustris</i> PS3                     | Irrigation         | Storage formulated inoculant applied into 300 g of soil per week                                                         | Maruba santoh                 | Pot: Promoted fresh and dry weight of shoot by 40–56%                                                                                                                                                                                   |
| 22 | Batool et al., 2017     | Pakistan  | <i>R. palustris</i> CS2 and SS5             | Seed bacterization | Adjust bacterial concentration to an OD <sub>600</sub> of 0.5 and dip seeds in bacterial inoculum for 15–20 minutes      | <i>Vigna mungo</i>            | Pot (Arsenic stress): Beneficial bacteria help to remediate soil containing arsenic; plant shoot and root lengths increased up to 12–24%.                                                                                               |
| 23 | Su et al., 2017         | China     | <i>R. palustris</i> GJ-22                   | Foliar spraying    | Apply $6 \times 10^7$ CFU/mL solution to the leaves                                                                      | Tobacco                       | Pot: Improved on IAA production and ISR response<br>Increased the number of first-class tobacco leaves by 27–40%<br>Enhanced seed germination rate                                                                                      |
| 24 | Nookongbut et al., 2018 | Thailand  | <i>R. palustris</i> C1                      | Irrigation         | $1 \times 10^8$ cells/mL (inoculation every week for 30 days)                                                            | Rice (HomNil and PathumThani) | Hydroponic (Arsenic stress): Reduced rice seedling loss by 50% through amelioration of arsenic toxicity in water<br>Improved vegetative growth and increased germination index by up to 10 times compared with that in other treatments |
|    |                         | Australia | <i>Ru. benzoatilyticus</i> C31              |                    |                                                                                                                          |                               |                                                                                                                                                                                                                                         |
| 25 | Imsong et al., 2018     | India     | Photosynthetic bacteria                     | Irrigation         | 50–150 L/ hectare of cell suspension                                                                                     | Broccoli                      | Field: Increased yield, quality and growth parameters                                                                                                                                                                                   |

|    |                         |                   |                                                    |                  |                                                                                                                                                                                                                            |                          |                                     |                                                                                                                                                                                                                                                                               |
|----|-------------------------|-------------------|----------------------------------------------------|------------------|----------------------------------------------------------------------------------------------------------------------------------------------------------------------------------------------------------------------------|--------------------------|-------------------------------------|-------------------------------------------------------------------------------------------------------------------------------------------------------------------------------------------------------------------------------------------------------------------------------|
| 26 | Khuong et al., 2018     | Vietnam           | <i>R. palustris</i> TLS06, VNW02, NNW64, and VNS89 | Irrigation       | 5.4 x 10 <sup>4</sup> cells/g DSW in 6 kg soil/pot                                                                                                                                                                         | Rice                     | Pot (low available phosphorus soil) | Increased rice grain yield by 26.5%<br>Improved plant height, panicle length, and the spikelet/panicle ratio                                                                                                                                                                  |
| 27 | Luo et al., 2019        | China             | <i>R. palustris</i> PSB06 and CGA009               | Irrigation       | Soak seeds for 3 h + root irrigation (15 days after transplanting)                                                                                                                                                         | Rice (LiangYou number 7) | Pot                                 | PSB treatment (Irrigation):<br>Increased rice stalks by 6–17%;<br>Increased peroxidase (POD), and superoxide dismutase (SOD) activities<br><br>CGA009 treatment (seed inoculation):<br>Increased rice stalks by approximately 5–30%;<br>Increased SOD activity                |
|    |                         |                   |                                                    | Seed inoculation | Soak seeds for 3 h                                                                                                                                                                                                         |                          |                                     |                                                                                                                                                                                                                                                                               |
| 28 | Ge and Zhang (2019)     | China             | <i>R. palustris</i> G5                             | Irrigation       | 25 mL per pot (10 <sup>8</sup> CFU/mL)                                                                                                                                                                                     | Cucumber                 | Pot (salt stress)                   | Increased shoot height, root length, and plant fresh and dry weight                                                                                                                                                                                                           |
| 29 | Nookongbut et al., 2020 | Thailand, Vietnam | <i>R. palustris</i> KTSSR54                        | Irrigation       | Suspend 10 <sup>8</sup> cfu/mL (OD = 0.5) of inoculum in 3 L of tap water every two weeks                                                                                                                                  | Rice                     | Pot                                 | Reduced grain loss (100-grain weight) by 15–40% under field conditions with biotic stress                                                                                                                                                                                     |
| 30 | Zhang et al., 2020      | China             | <i>R. palustris</i> GJ-22                          | Foliar spraying  | 6.79 x 10 <sup>6</sup> or 19 x 10 <sup>7</sup> CFU/mL on 3 <sup>rd</sup> to 4 <sup>th</sup> leaf, total volume is 50 mL per pot                                                                                            | Potato tuber Xingjia2    | Pot                                 | Reduced late blight disease through bio-control                                                                                                                                                                                                                               |
| 31 | Kang et al., 2020       | Korea             | <i>R. sphaeroides</i> KE149                        | Irrigation       | 50 mL of cell suspension (1 x 10 <sup>8</sup> CFU/mL) for 7 days                                                                                                                                                           | Adzuki bean              | Pot (water stress)                  | Decreased stress-responsive endogenous abscisic acid and jasmonic acid and increased salicylic acid<br>Increased the levels of calcium (Ca), magnesium (Mg), and potassium (K)<br>Increased root length, shoot length, stem diameter, biomass, and higher chlorophyll content |
| 32 | Lo et al., 2020         | Taiwan            | <i>R. palustris</i> sp. PS3 and YSC3               | Irrigation       | 250 mL of modified cell suspension medium (10 <sup>8</sup> CFU/mL) into 30 L of tank containing nutrient solution per week<br>2 mL of modified cell suspension medium (10 <sup>8</sup> CFU/mL) into 300 g of soil per week | Cuiyu cabbage            | Hydroponic<br><br>Pot               | Promoted shoot and root weight by 12–48%                                                                                                                                                                                                                                      |

|    |                       |          |                                                           |            |                                                                                                  |               |                            |                                                                                                                                                                                                                                                                                                                                                                           |
|----|-----------------------|----------|-----------------------------------------------------------|------------|--------------------------------------------------------------------------------------------------|---------------|----------------------------|---------------------------------------------------------------------------------------------------------------------------------------------------------------------------------------------------------------------------------------------------------------------------------------------------------------------------------------------------------------------------|
| 33 | Xiao et al., 2021     | China    | <i>R. palustris</i> sp.                                   | Irrigation | Apply 24 g/m <sup>2</sup> of inoculum in the tillering stage                                     | Rice          | Pot                        | Increased rice yields by 9.84–17.73%                                                                                                                                                                                                                                                                                                                                      |
| 34 | Kang et al., 2021     |          | <i>R. sphaeroides</i> KE149                               | Irrigation | 10 mL of cell suspension (10 <sup>8</sup> CFU/mL)                                                | Soybean       | Pot (water logging stress) | Improved plant morphological attributes, such as root length, shoot length, and fresh biomass.<br>Increased jasmonic acid, phenolic and flavonoids contents<br>Enhanced the levels of endogenous phytohormones (such as abscisic acid) under water lodging conditions<br>Decreased the levels of endogenous phytohormones (such as abscisic acid) under normal conditions |
| 35 | Hsu et al., 2021      | Taiwan   | <i>R. palustris</i> sp. PS3 and YSC3                      | Irrigation | 10 <sup>6</sup> CFU/mL per week                                                                  | Maruba santoh | Hydroponic                 | Increased cabbage fresh weight by 50% compared with that of the control<br>Increased consumable leaf expansion and cell plate number                                                                                                                                                                                                                                      |
| 36 | Sakpirom et al., 2021 | Thailand | <i>R. palustris</i> TN110 and <i>R. gelatinosus</i> TN414 | Irrigation | 1 × 10 <sup>8</sup> CFU/mL; 1 × 10 <sup>7</sup> CFU/mL                                           | Paddy         | Pot                        | Both liquid and solid formulations increased rice growth and parameters in paddy soil compared with controls.                                                                                                                                                                                                                                                             |
| 37 | Liu et al., 2021      | China    | <i>R. sphaeroides</i>                                     | Irrigation | 1 × 10 <sup>7</sup> CFU/g per pot                                                                | Oilseed rape  | Pot                        | Increased the plant total N<br>Recruit beneficial diazotrophic rhizobacteria                                                                                                                                                                                                                                                                                              |
| 38 | Wang et al., 2021     | China    | <i>R. palustris</i> ISP-1                                 | Irrigation | Adjust to 10 <sup>8</sup> CFU/mL and 300 L/ha of suspensions for twice, sowing and pegging stage | Peanut        | Field                      | Increased 12.5% of total peanut yield and nutrient content in soil                                                                                                                                                                                                                                                                                                        |

Highlighted in dark grey represent the updated references not included in Sarkarika et al., 2020: #10, #12, #14, #15, #16, #21, #25, #27, #28, #29, #31, #32, #33, #34, #35, #36, #37, #38.

**Supplementary Table S2.** Plant growth responses to PS3 inoculation under different experimental conditions and farming systems.

| Farming System                      | Plant Species                        | Application Method | Dosage (CFU/g soil) | Instructions      | Inoculations | Effects                                                                                                                                                            |
|-------------------------------------|--------------------------------------|--------------------|---------------------|-------------------|--------------|--------------------------------------------------------------------------------------------------------------------------------------------------------------------|
| Conventional                        | Heading Chinese cabbage              | Irrigation         | $10^5$ – $10^6$     | 20 mL per plant   | 8            | yield increased by ~39%                                                                                                                                            |
| Organic                             | Chinese cabbage                      | Irrigation         | $10^5$ – $10^7$     | 200 L per hectare | 1            | yield increased by ~43%                                                                                                                                            |
|                                     | Lettuce                              | Irrigation         | $10^5$ – $10^7$     | 200 L per hectare | 1            | yield increased by ~30%                                                                                                                                            |
|                                     | Sesame leaves                        | Irrigation         | $10^5$ – $10^7$     | 200 L per hectare | 1            | yield increased by 25–30%                                                                                                                                          |
|                                     | Tomato                               | Irrigation         | $10^5$ – $10^7$     | 200 mL per plant  | 3            | yield increased by ~25% and ~38% in fruit fresh and dry weights, respectively; sugar/acid ratio increased by 45%; vitamin C and lycopene contents increased by 25% |
| Conventional with organic amendment | Chinese flowering cabbage (choi sum) | Irrigation         | $10^5$ – $10^7$     | 200 L per hectare | 1            | yield increased by ~27%                                                                                                                                            |
|                                     | Pepper leaves                        | Irrigation         | $10^5$ – $10^7$     | 200 L per hectare | 1            | yield increased by ~26%                                                                                                                                            |

## Reference

- Kobayashi, M.; Haque, M. Z., Contribution to nitrogen fixation and soil fertility by photosynthetic bacteria. *Plant Soil* **1971**, *35* (1), 443–456.
- Kobayashi, M.; Tchan, Y. T., Treatment of industrial waste solutions and production of useful by-products using a photosynthetic bacterial method. *Water Research* **1973**, *7* (8), 1219–1224.
- Elbadry, M.; El-Bassel, A.; Elbanna, K., Occurrence and dynamics of phototrophic purple nonsulphur bacteria compared with other asymbiotic nitrogen fixers in ricefields of Egypt. *World Journal of Microbiology and Biotechnology* **1999**, *15* (3), 359–362.
- Elbadry, M.; Gamal-Eldin, H.; Elbanna, K., Effects of *Rhodobacter capsulatus* inoculation in combination with graded levels of nitrogen fertilizer on growth and yield of rice in pots and lysimeter experiments. *World J. Microbiol. Biotechnol.* **1999**, *15*, 393–395.
- Harada, N.; Nishiyama, M.; Otsuka, S.; Matsumoto, S., Effects of inoculation of phototrophic purple bacteria on grain yield of rice and nitrogenase activity of paddy soil in a pot experiment. *Soil Science & Plant Nutrition* **2005**, *51* (3), 361–367.
- Koh, R.-H.; Song, H.-G., Effects of application of *Rhodospseudomonas* sp. on seed germination and growth of tomato under axenic conditions. *J. Microbiol. Biotechnol.* **2007**, *17*, 1805–10.
- Lee, K.-H.; Koh, R.-H.; Song, H.-G., Enhancement of growth and yield of tomato by *Rhodospseudomonas* sp. under greenhouse conditions. *The Journal of Microbiology* **2008**, *46* (6), 641–646.
- Kondo, K.; Nakata, N.; Nishihara, E., Effect of the purple non-sulfur bacterium (*Rhodobacter sphaeroides*) on the Brix, titratable acidity, ascorbic acid, organic acid, lycopene and  $\beta$ -carotene in tomato fruit. *Journal of Food, Agriculture & Environment* **2010**, *8* (2 part 2), 743–746.
- Gamal-Eldin, H.; Elbanna, K., Field evidence for the potential of *Rhodobacter capsulatus* as biofertilizer for flooded rice. *Curr Microbiol* **2011**, *62* (2), 391–5.
- Yin, Z.; Shang, Z.; Wei, C.; Ren, J.; Song, X., Foliar sprays of photosynthetic bacteria improve the growth and anti-oxidative capability on Chinese dwarf cherry seedlings. *Journal of Plant Nutrition - J PLANT NUTR* **2012**, *35*, 840–853.
- Wu, Y.; Jin, X.; Liao, W.; Hu, L.; Dawuda, M. M.; Zhao, X.; Tang, Z.; Gong, T.; Yu, J., 5-Aminolevulinic Acid (ALA) alleviated salinity stress in cucumber seedlings by enhancing chlorophyll synthesis pathway. *Frontiers in Plant Science* **2018**, *9* (635).
- Kang, S.-M.; Radhakrishnan, R.; You, Y.-H.; Khan, A.; Park, J.-M.; Lee, S.-M.; Lee, I.-J.; Francis, T., Cucumber performance is improved by inoculation with plant growth-promoting microorganisms. *Acta Agriculturae Scandinavica, Section B - Soil & Plant Science* **2014**, *65*.
- Wong, W. T.; Tseng, C. H.; Hsu, S. H.; Lur, H. S.; Mo, C. W.; Huang, C. N.; Hsu, S. C.; Lee, K. T.; Liu, C. T., Promoting effects of a single *Rhodospseudomonas palustris* inoculant on plant growth by *Brassica rapa chinensis* under low fertilizer input. *Microbes Environ* **2014**, *29* (3), 303–13.

14. Yang, F.; Tian, J. Y.; Yang, P. P.; Feng, H.; He, G. S.; Chen, X. D.; Lu, Y. S.; Peng, G. X., Effects of inoculant of photosynthetic bacteria on tomato quality, soil fertility and soil microbial characteristics. *Journal of South China Agricultural University* **2014**, *35* (1), 49–54.
15. Miao, J.S. L., J.; Liu, Y.L.; Wu, J.f., Effect of photosynthetic bacterial on photosynthesis and antioxidant enzyme system of watermelon seedlings in early spring. *Northern Horticulture* **2014** (21), 42–44.
16. Ge, H.-L.; Zhang, F.-L., The effects of composite photosynthetic bacterial inoculant PS21 on the biochemical characteristics of wheat seedlings under tetrabromobisphenol A stress. *Biotechnology & Biotechnological Equipment* **2015**, *29*, 1–10.
17. Hsu, S. L., K.; Fang, W.; Lur, H.; Liu, C., Application of phototrophic bacterial inoculant to reduce nitrate content in hydroponic leafy vegetables. *Crop Environ. Bioinf.* **2015**, *12* (1), 30–41.
18. Kantha, T.; Kantachote, D.; Klongdee, N., Potential of biofertilizers from selected *Rhodopseudomonas palustris* strains to assist rice (*Oryza sativa* L. subsp. indica) growth under salt stress and to reduce greenhouse gas emissions. *Annals of microbiology* **2015**, *65* (4), 2109–2118.
19. Kantachote, D.; Nunkaew, T.; Kantha, T.; Chaiprapat, S., Biofertilizers from *Rhodopseudomonas palustris* strains to enhance rice yields and reduce methane emissions. *Applied Soil Ecology* **2016**, *100*, 154–161.
20. Xu, J.; Feng, Y.; Wang, Y.; Luo, X.; Tang, J.; Lin, X., The foliar spray of *Rhodopseudomonas palustris* grown under *Stevia* residue extract promotes plant growth via changing soil microbial community. *Journal of Soils and Sediments* **2016**, *16* (3), 916–923.
21. Lee, S.-K.; Lur, H.-s.; Lo, K.-J.; Cheng, K.-C.; Chuang, C. C.; Tang, S.-J.; Yang, Z.-w.; Liu, C.-T., Evaluation of the effects of different liquid inoculant formulations on the survival and plant-growth-promoting efficiency of *Rhodopseudomonas palustris* strain PS3. *Appl. Microbiol. Biotechnol.* **2016**, *100*, 7977–7987.
22. Batool, K.; tuz Zahra, F.; Rehman, Y., Arsenic-redox transformation and plant growth promotion by purple nonsulfur bacteria *Rhodopseudomonas palustris* CS2 and *Rhodopseudomonas faecalis* SS5. *BioMed Res. Int.* **2017**, *2017*, 6250327.
23. Su, P.; Tan, X.; Li, C.; Zhang, D.; Cheng, J.; Zhang, S.; Zhou, X.; Yan, Q.; Peng, J.; Zhang, Z.; Liu, Y.; Lu, X., Photosynthetic bacterium *Rhodopseudomonas palustris* GJ-22 induces systemic resistance against viruses. *Microb Biotechnol* **2017**, *10* (3), 612–624.
24. Nookongbut, P.; Kantachote, D.; Nguyen Quoc, K.; Khuong, Q.; Sukhoom, A.; Tantirungkij, M.; Limtong, S., Selection of acid-resistant purple nonsulfur bacteria from peat swamp forests to apply as biofertilizers and biocontrol agents. *Journal of Soil Science and Plant Nutrition* **2019**, *19*.
25. Imsong, T.; Bahadur, V.; Topno, S. E., Influence of photosynthetic bacteria and Biochar on the growth, yield and quality of broccoli (*Brassica oleracea* var. italica). *Journal of Pharmacognosy and Phytochemistry* **2018**, *7* (3), 3722–372.
26. Khuong, N. Q.; Kantachote, D.; Onthong, J.; Xuan, L. N. T.; Sukhoom, A., Enhancement of rice growth and yield in actual acid sulfate soils by potent acid-resistant *Rhodopseudomonas palustris* strains for producing safe rice. *Plant Soil* **2018**, *429* (1), 483–501.
27. Luo, L.; Wang, P.; Zhai, Z.; Su, P.; Tan, X.; Zhang, D.; Zhang, Z.; Liu, Y., The effects of *Rhodopseudomonas palustris* PSB06 and CGA009 with different agricultural applications on rice growth and rhizosphere bacterial communities. *AMB Express* **2019**, *9* (1), 173.
28. Ge, H.; Zhang, F., Growth-promoting ability of *Rhodopseudomonas palustris* G5 and its effect on induced resistance in cucumber against salt stress. *Journal of Plant Growth Regulation* **2019**, *38* (1), 180–188.
29. Nookongbut, P.; Kantachote, D.; Nguyen Quoc, K.; Tantirungkij, M., The biocontrol potential of acid-resistant *Rhodopseudomonas palustris* KTSSR54 and its exopolymers against rice fungal pathogens to enhance rice growth and yield. *Biol. Control* **2020**, *150*, 104354.
30. Zhang, X.; Li, X.; Zhang, Y.; Chen, Y.; Tan, X.; Su, P.; Zhang, D.; Liu, Y., Integrated control of potato late blight with a combination of the photosynthetic bacterium *Rhodopseudomonas palustris* strain GJ-22 and fungicides. *Biocontrol* **2020**, *65*, 635–645.
31. Kang, S. M.; Adhikari, A.; Lee, K. E.; Khan, M. A.; Khan, A. L.; Shahzad, R.; Dhungana, S. K.; Lee, I. J., Inoculation with indole-3-acetic acid-producing rhizospheric *Rhodobacter sphaeroides* KE149 augments growth of Adzuki bean plants under water stress. *Journal of microbiology and biotechnology* **2020**, *30* (5), 717–725.
32. Lo, K.-J.; Lee, S.-K.; Liu, C.-T., Development of a low-cost culture medium for the rapid production of plant growth-promoting *Rhodopseudomonas palustris* strain PS3. *PLoS One* **2020**, *15* (7), e0236739.
33. Xiao, X.; Zhu, Y.; Gao, Y.; Fu, J.; Zhao, Y.; Zhao, L., Inoculation of paddy soils with *Rhodopseudomonas palustris* enhanced heavy metal immobilisation. *Plant, Soil and Environment* **2021**, *67*.
34. Kang, S.-M.; Adhikari, A.; Khan, M. A.; Kwon, E.-H.; Park, Y.-S.; Lee, I.-J., Influence of the rhizobacterium *Rhodobacter sphaeroides* KE149 and biochar on waterlogging stress tolerance in *Glycine max* L. *Environments* **2021**, *8* (9), 94.
35. Hsu, S.-H.; Shen, M.-W.; Chen, J.-C.; Lur, H.-S.; Liu, C.-T., The photosynthetic bacterium *Rhodopseudomonas palustris* strain PS3 exerts plant growth-promoting effects by stimulating nitrogen uptake and elevating auxin levels in expanding leaves. *Front. Plant. Sci.* **2021**, *12* (93).
36. Sakpirom, J.; Nunkaew, T.; Khan, E.; Kantachote, D., Optimization of carriers and packaging for effective biofertilizers to enhance *Oryza sativa* L. growth in paddy soil. *Rhizosphere* **2021**, *19*, 100383.
37. Liu, Y.; Gao, J.; Bai, Z.; Wu, S.; Li, X.; Wang, N.; Du, X.; Fan, H.; Zhuang, G.; Bohu, T.; Zhuang, X., Unraveling mechanisms and impact of microbial recruitment on oilseed rape (*Brassica napus* L.) and the rhizosphere mediated by plant growth-promoting rhizobacteria. *Microorganisms* **2021**, *9* (1).



38. Wang, Y.; Peng, S.; Hua, Q.; Qiu, C.; Wu, P.; Liu, X.; Lin, X., The long-term effects of using phosphate-solubilizing bacteria and photosynthetic bacteria as biofertilizers on peanut yield and soil bacteria community. *Front Microbiol* **2021**, *12*, 693535.
39. Sakarika, M.; Spanoghe, J.; Sui, Y.; Wambacq, E.; Grunert, O.; Haesaert, G.; Spiller, M.; Vlaeminck, S.E. Purple non-sulphur bacteria and plant production: Benefits for fertilization, stress resistance and the environment. *Microb. Biotechnol.* **2020**, *13*, 1336–1365. <https://doi.org/10.1111/1751-7915.13474>.
40. Lo, K.-J.; Lin, S.-S.; Lu, C.-W.; Kuo, C.-H.; Liu, C.-T. Whole-genome sequencing and comparative analysis of two plant-associated strains of *Rhodopseudomonas palustris* (PS3 and YSC3). *Sci. Rep.* **2018**, *8*, 1–15.
